# Supplementary material for: Evaluation of Xpert Carba‐R Assay for the Detection of Carbapenemase Genes in Gram‐Negative Bacteria
Source: Hindawi journal article supplement (doi:10.1155/2021/6614812), 2021-01-01
Supplement: f1 [file 6614812.f1.pdf]

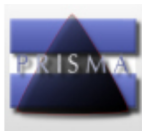

PRISMA 2009 Flow Diagram

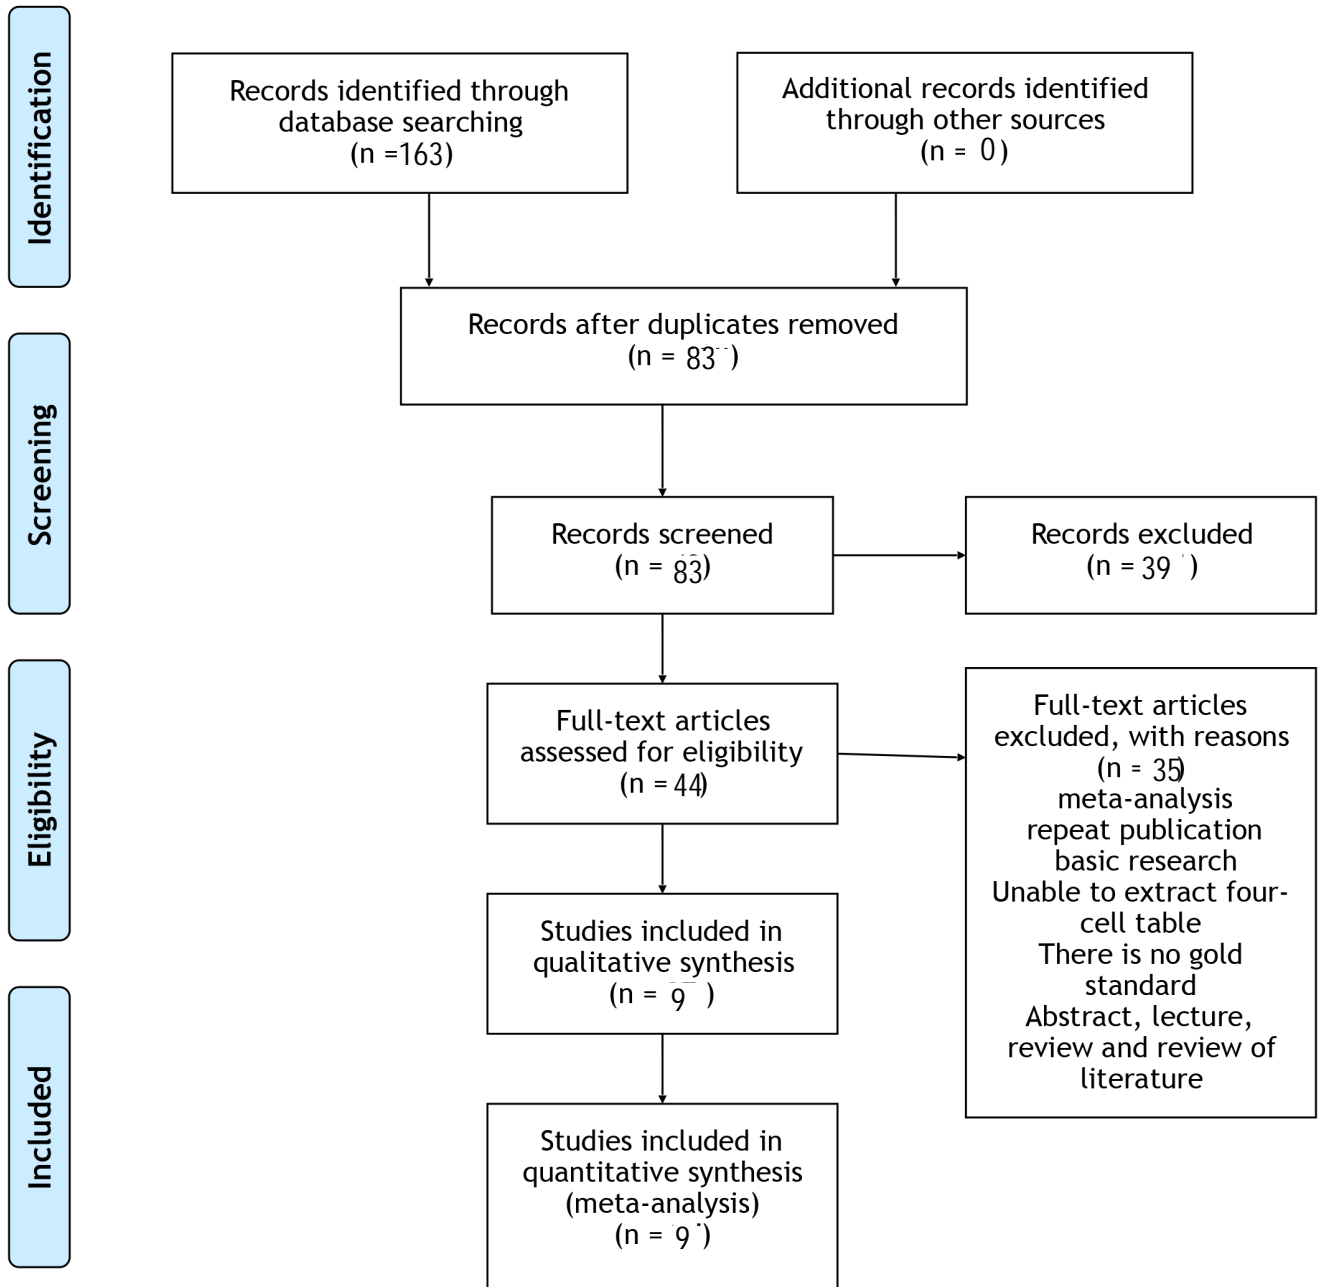

From: Moher D, Liberati A, Tetzlaff J, Altman DG, The PRISMA Group (2009). Preferred Reporting Items for Systematic Reviews and Meta-Analyses: The PRISMA Statement. PLoS Med 6(6): e1000097. doi:10.1371/journal.pmed1000097

For more information, visit [www.prisma-statement.org](http://www.prisma-statement.org).
